# Supplementary material for: Mg9Si5: a potential non-toxic thermoelectric material for mid-temperature applications
Source: Royal Society of Chemistry journal article supplement (doi:10.1039/c6ra08389g), 2016-01-01
Supplement: c6ra08389g1.pdf [file c6ra08389g1.pdf]

## Supplementary Information:

Mg<sub>9</sub>Si<sub>5</sub> crystallizes in the hexagonal structure with space group symmetry  $P6_3$  (space group No. 173). The lattice parameters  $a=12.411\text{\AA}$  and  $c=12.345\text{\AA}$  are taken from the experiments. The GGA optimized coordinates of Mg<sub>9</sub>Si<sub>5</sub> are given below, which is compared with experimental data of Ref. 38 of the revised manuscript.

|      |    | Expterimental |        |         | Optimized structure |        |         |
|------|----|---------------|--------|---------|---------------------|--------|---------|
| Site |    | $x$           | $y$    | $z$     | $x$                 | $y$    | $z$     |
| Mg   | 6c | 0.2433        | 0.1698 | 0.2526  | 0.2430              | 0.1701 | 0.2884  |
| Mg   | 6c | 0.5335        | 0.4047 | 0.2541  | 0.5327              | 0.4041 | 0.7875  |
| Mg   | 6c | 0.0773        | 0.2331 | 0.0939  | 0.0701              | 0.2129 | 0.6264  |
| Mg   | 6c | 0.8270        | 0.2528 | 0.0793  | 0.8276              | 0.2534 | 0.1145  |
| Mg   | 6c | 0.4982        | 0.5894 | 0.0901  | 0.5007              | 0.5910 | 0.1228  |
| Mg   | 6c | 0.2656        | 0.4566 | 0.2558  | 0.2659              | 0.4570 | 0.2864  |
| Mg   | 6c | 0.2539        | 0.4259 | -0.0730 | 0.2523              | 0.4243 | 0.9611  |
| Mg   | 6c | 0.4995        | 0.4089 | -0.0811 | 0.5008              | 0.4108 | 0.9513  |
| Mg   | 6c | 0.0721        | 0.2132 | 0.4141  | 0.0774              | 0.2352 | 0.4474  |
| Si   | 2a | 0.000         | 0.000  | 0.0436  | 0.000               | 0.000  | 0.00258 |
| Si   | 2a | 0.000         | 0.000  | -0.0338 | —                   | —      | —       |
| Si   | 2a | 0.000         | 0.000  | 0.2492  | 0.000               | 0.000  | 0.29935 |
| Si   | 6c | 0.3310        | 0.0037 | 0.2556  | 0.3315              | 0.0040 | 0.2858  |
| Si   | 2b | 0.3333        | 0.6667 | -0.0951 | 0.3333              | 0.6667 | 0.9381  |
| Si   | 6c | 0.3363        | 0.3353 | 0.4195  | 0.3359              | 0.3362 | 0.4519  |
| Si   | 6c | 0.3358        | 0.3358 | 0.0896  | 0.3359              | 0.3356 | 0.1224  |
| Si   | 2b | 0.3333        | 0.6667 | 0.1080  | 0.3333              | 0.6667 | 0.1404  |
| Si   | 2b | 0.6667        | 0.3333 | -0.0970 | 0.6667              | 0.3333 | 0.9363  |
| Si   | 2b | 0.6667        | 0.3333 | 0.1057  | 0.6667              | 0.3333 | 0.6386  |
